# Supplementary material for: A Second-Generation (44-Channel) Suprachoroidal Retinal Prosthesis: A Single-Arm Clinical Trial of Feasibility
Source: PubMed Central journal article supplement — Ophthalmol Sci. 2024 May 28;5(1):100525. doi: 10.1016/j.xops.2024.100525 (PMC11426041; doi:10.1016/j.xops.2024.100525), 2024-05-28
Supplement: mmc1.pdf [file mmc1.pdf]

## SUPPLEMENTAL MATERIALS

### Appendix A: The Bionics Institute and Centre for Eye Research Australia Retinal

#### Prosthesis Consortium

For this publication, the Bionics Institute and Centre for Eye Research Australia Retinal Prosthesis

Consortium in addition to the named authors consists of (in alphabetical order): Peter J. Blamey;

Robert J. Briggs; Owen Burns; Dean Johnson; Hugh J. McDermott; Ceara McGowan; Rodney E.

Millard; Peter M. Seligman; Robert K. Shepherd; Mohit N. Shivdasani; Nicholas C. Sinclair; Patrick C.

Thien; Joel Villalobos; Chris E. Williams; Jonathan Yeoh; Stephanie B. Epp; Kiera A. Young
