# Supplementary material for: A Second-Generation (44-Channel) Suprachoroidal Retinal Prosthesis: A Single-Arm Clinical Trial of Feasibility
Source: PubMed Central journal article supplement — Ophthalmol Sci. 2024 May 28;5(1):100525. doi: 10.1016/j.xops.2024.100525 (PMC11426041; doi:10.1016/j.xops.2024.100525), 2024-05-28
Supplement: mmc2.pdf [file mmc2.pdf]

# SUPPLEMENTAL MATERIALS

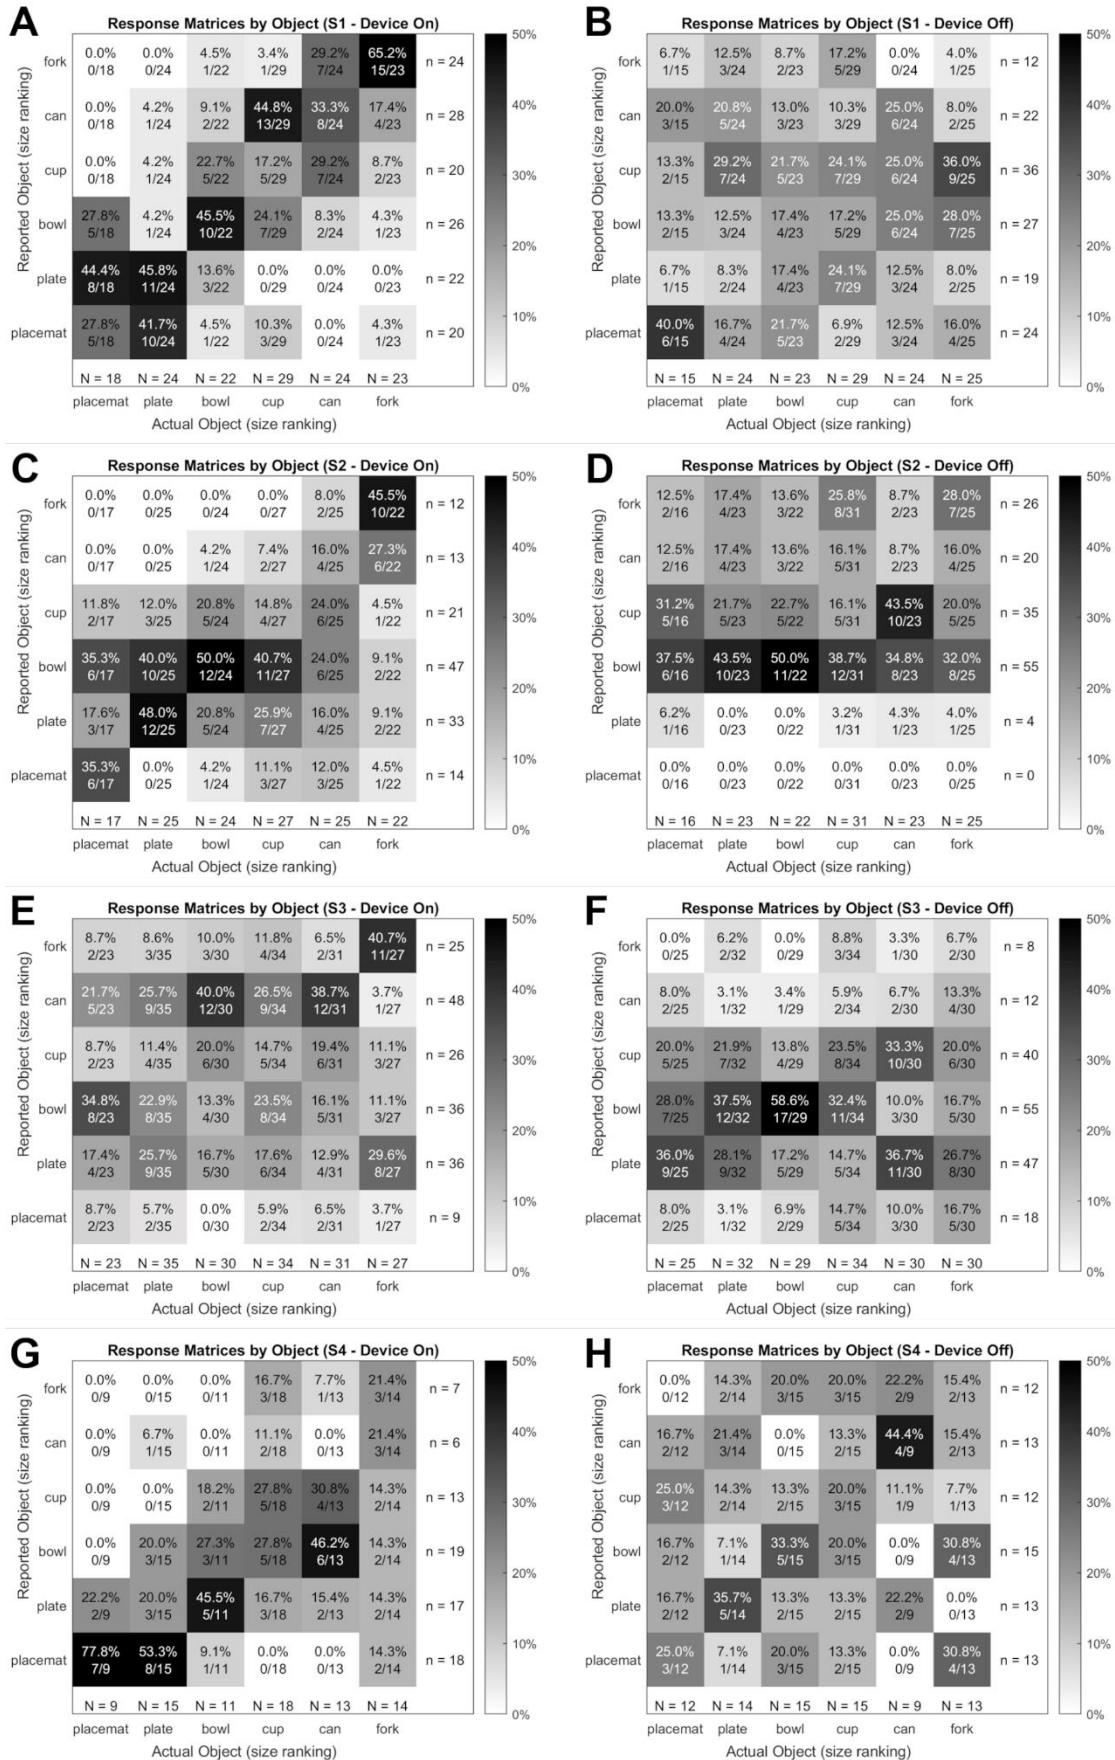

**Figure S11:** Response Matrices for Tabletop Object Identification per participant (S1, S2, S3, S4), pooled from all time-points, with Device On (**A,C,E,G**) and Device Off (**B,D,F,H**). Objects are ranked in size order. Darker cells indicate higher incidence of Reported Object (y-axis) for a given Actual Object (x-axis). Cell text indicates incidence percent and fraction of actual object incidence. Row numerator totals,  $n$ , are the response incidence. Column numerator totals,  $N$ , are the total object incidence. Correct responses fall on the diagonal line of cells from bottom-left to top-right. Note that the color-bar saturates at 50% to differentiate lower scores.
