# Supplementary material for: A Second-Generation (44-Channel) Suprachoroidal Retinal Prosthesis: A Single-Arm Clinical Trial of Feasibility
Source: PubMed Central journal article supplement — Ophthalmol Sci. 2024 May 28;5(1):100525. doi: 10.1016/j.xops.2024.100525 (PMC11426041; doi:10.1016/j.xops.2024.100525), 2024-05-28
Supplement: mmc3.pdf [file mmc3.pdf]

## SUPPLEMENTAL MATERIALS

**Supplementary Table S1:** Inclusion and exclusion criteria for participant selection

| <i>Inclusion Criteria</i>                                                                                                                                           | <i>Exclusion Criteria</i>                                                                                                                                                                                                                                 |
|---------------------------------------------------------------------------------------------------------------------------------------------------------------------|-----------------------------------------------------------------------------------------------------------------------------------------------------------------------------------------------------------------------------------------------------------|
| Aged 18 years or older                                                                                                                                              | Optic nerve disease (history of glaucoma of more than 1 month, or history of any other optic neuropathy)                                                                                                                                                  |
| Either gender                                                                                                                                                       | Diseases of the inner retina including, but not limited to, central retinal artery or vein occlusion (CRAO, CRVO), end stage diabetic retinopathy, retinal detachment, traumatic retinal damage, infectious retinal disease, inflammatory retinal disease |
| A confirmed history of outer retinal degenerative disease such as retinitis pigmentosa or choroideremia                                                             | Inability to visualize the retina due to corneal or other ocular media opacities (corneal degenerations, dense cataracts, trauma, lid malposition)                                                                                                        |
| Remaining visual acuity of bare light perception or less in both eyes                                                                                               | Any ocular condition that predisposes the participant to rubbing their eyes                                                                                                                                                                               |
| Functional inner retina (ganglion cells and optic nerve), as shown by the ability to perceive light and/or a measurable corneal electrically evoked visual response | Cognitive deficiencies, including dementia or progressive neurological disease                                                                                                                                                                            |
| A history of at least 10 years of useful form vision in the worse seeing eye                                                                                        | Psychiatric disorders, including depression, as diagnosed by a qualified psychologist                                                                                                                                                                     |
|                                                                                                                                                                     | Deafness or significant hearing loss, or presence of a cochlear implant                                                                                                                                                                                   |
|                                                                                                                                                                     | Inability to speak or understand English                                                                                                                                                                                                                  |
|                                                                                                                                                                     | Pregnancy                                                                                                                                                                                                                                                 |
|                                                                                                                                                                     | Participant enrolled in another investigational drug or device trial for the treatment of their ocular condition                                                                                                                                          |
|                                                                                                                                                                     | Poor general health, which would exclude them from obtaining a general anesthetic                                                                                                                                                                         |
|                                                                                                                                                                     | Unrealistic expectations of the investigational device to provide functional vision                                                                                                                                                                       |
|                                                                                                                                                                     | Poorly controlled diabetes                                                                                                                                                                                                                                |
|                                                                                                                                                                     | Epilepsy                                                                                                                                                                                                                                                  |
|                                                                                                                                                                     | Unsuitable level of regular nystagmus (which would prevent ocular images from being obtained)                                                                                                                                                             |
|                                                                                                                                                                     | Anyone with medical devices (implanted or carried) that could cause serious health problems if compromised by electro-magnetic interference                                                                                                               |
